# Supplementary material for: Transcriptome analysis of the salivary glands of the grain aphid, Sitobion avenae
Source: PubMed Central journal article supplement (PMC5698471; doi:10.1038/s41598-017-16092-z), 2017-11-21

# Transcriptome analysis of the salivary glands of the grain aphid, *Sitobion avenae*

Yong Zhang<sup>1,2</sup>, Jia Fan<sup>1</sup>, Jingrui Sun<sup>1</sup>, Frédéric Francis<sup>2\*</sup>, Julian Chen<sup>1\*</sup>

<sup>1</sup> State Key Laboratory of Plant Diseases and Insect Pests, Institute of Plant Protection, Chinese Academy of Agricultural Sciences, Beijing, 100193, PR China

<sup>2</sup> Functional and Evolutionary Entomology, Gembloux Agro-Bio Tech, University of Liège, Gembloux, B-5030, Belgium

Corresponding authors: Julian Chen, Tel: +86 10 62813685; E-mail: jlchen@ippcaas.cn ; Frédéric Francis, Tel.: +32 81 622283; E-mail: Frederic.Francis@ulg.ac.be.

## Supplementary Figures

**Supplementary Figure 1.** The enriched GO and KOG molecular functions for all salivary gland-expressed genes.

**Supplementary Figure 2.** The KEGG pathway for all salivary gland-expressed genes.

**Supplementary Figure 3.** The full-length gels for each unigenes presented in Figure 5a.

**Supplementary Figure 4.** The full-length gels for each unigenes presented in Figure 6a.

## Supplementary Tables

**Supplementary Table 1.** List of all unigenes in the salivary glands of *S.avenae*.

**Supplementary Table 2.** List of genes with a putative signal peptide.

**Supplementary Table 3.** List of top 15 highly expressed genes and 9 interested genes in salivary glands of *S.avenae*.

**Supplementary Table 4** List of all primers used in RT-PCR and qRT-PCR

# Supplementary Figure 1. The enriched GO and KOG molecular functions for all salivary gland-expressed genes.

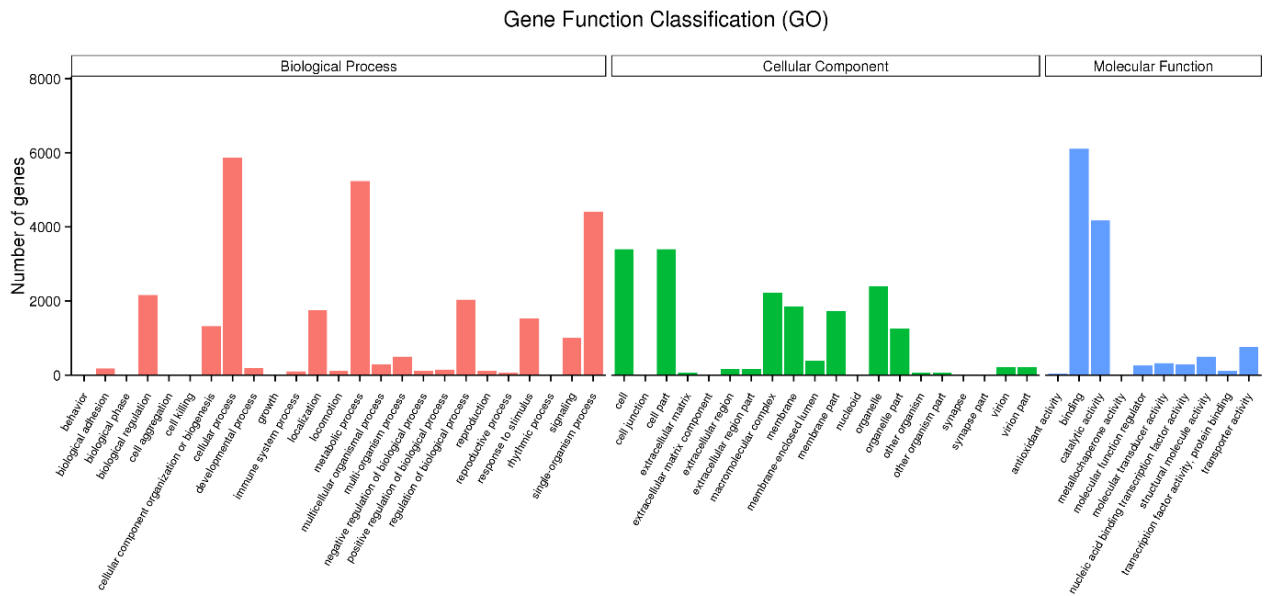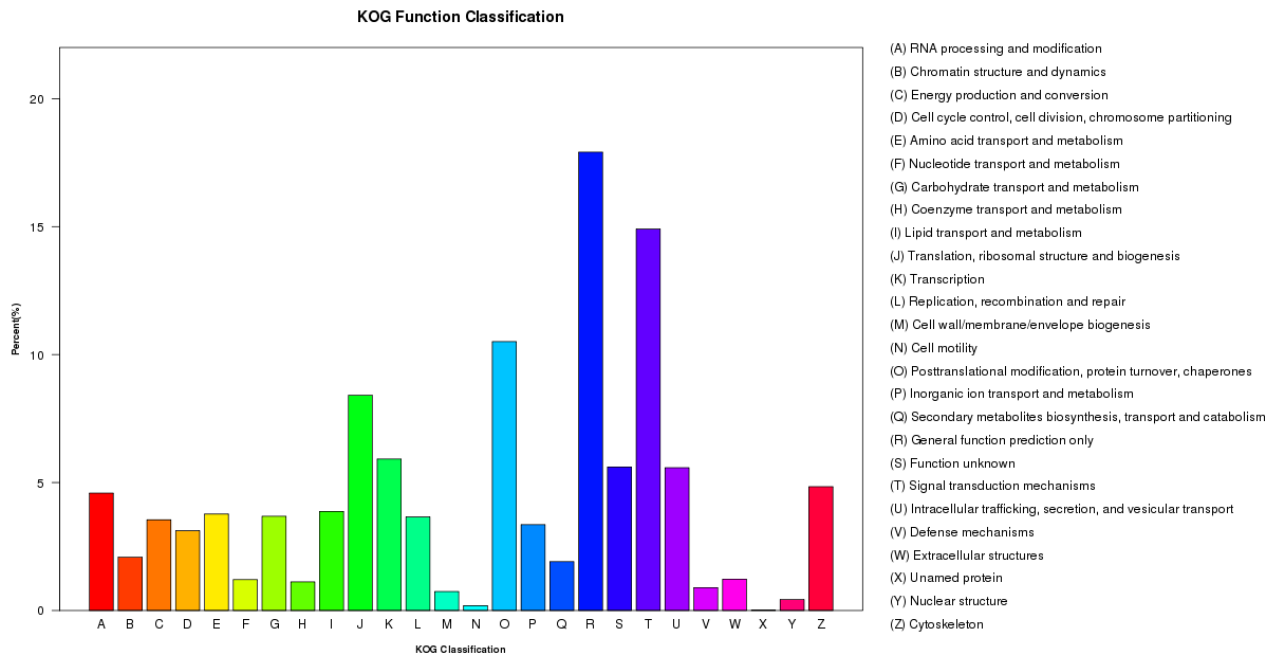

**Supplementary Figure 2. The KEGG pathway for all salivary gland-expressed genes. A: Cellular Processes; B: Environmental Information Processing; C: Genetic Information Processing; D: Metabolism; E: Organismal Systems.**

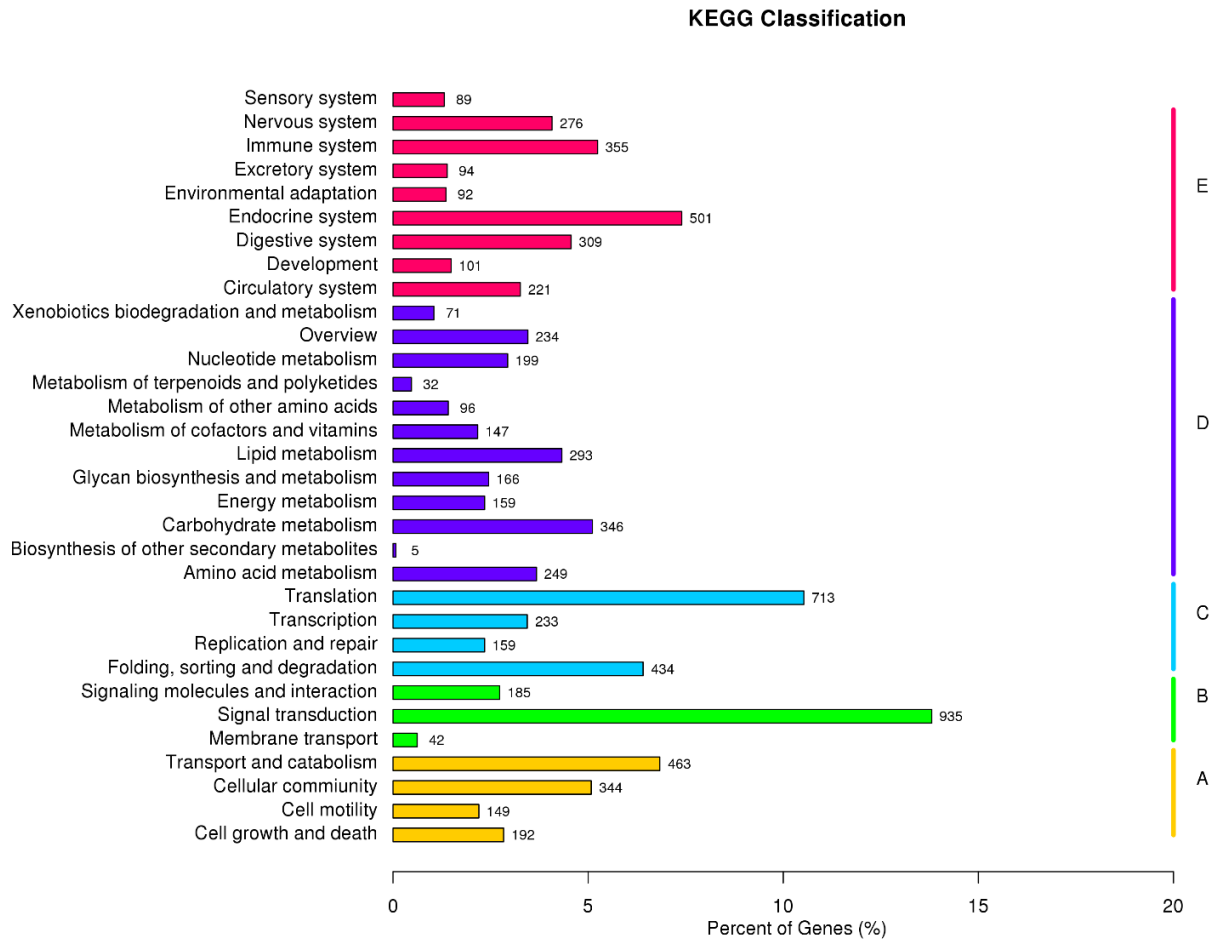

**Supplementary Figure 3. The full-length gels for each unigenes presented in Figure 5a.**

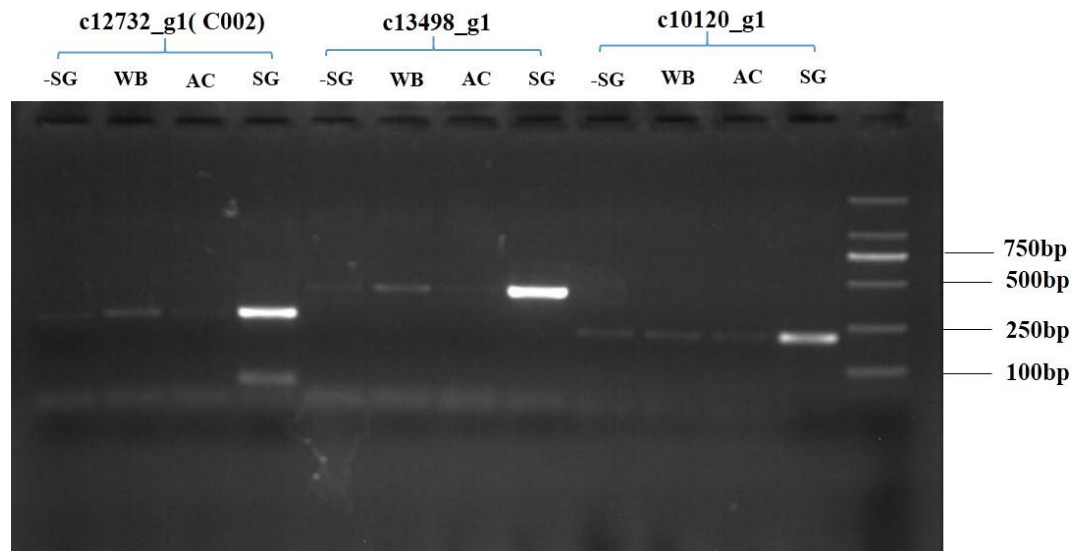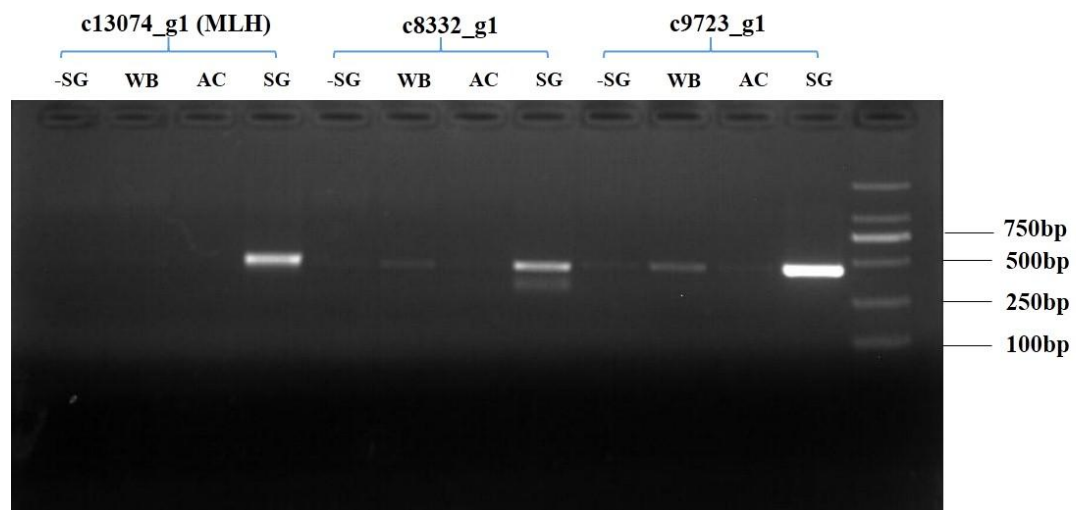

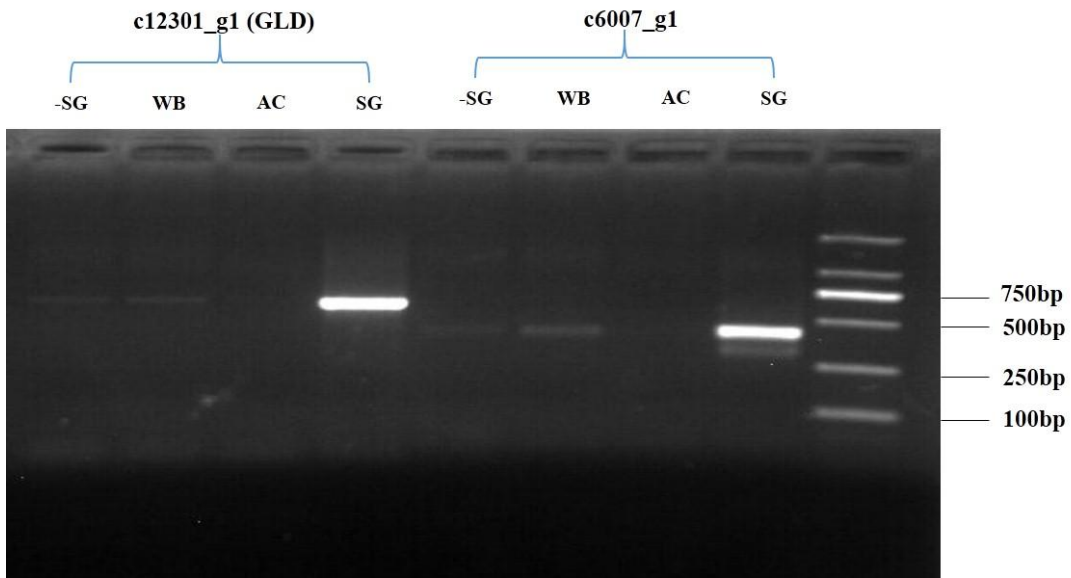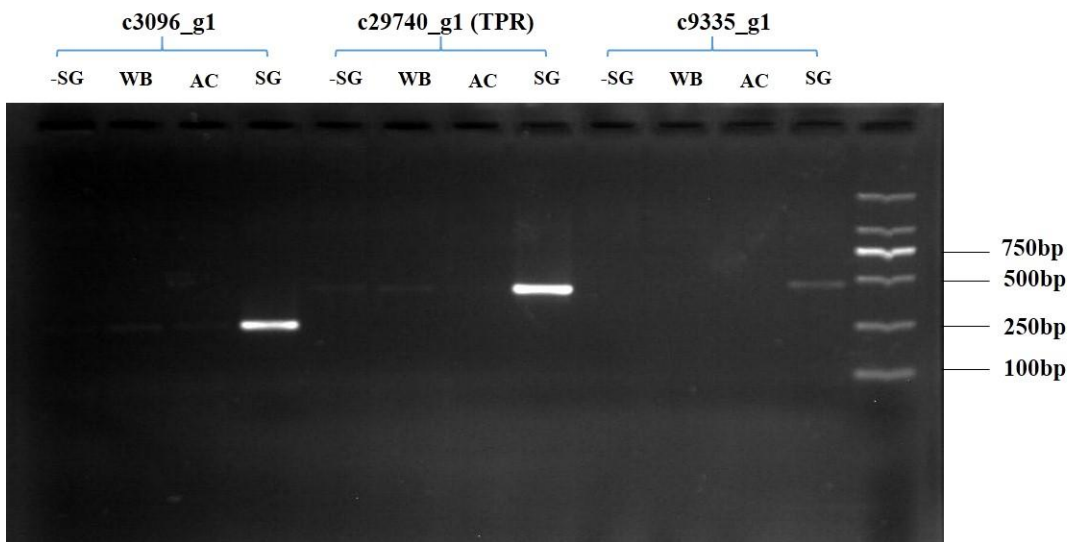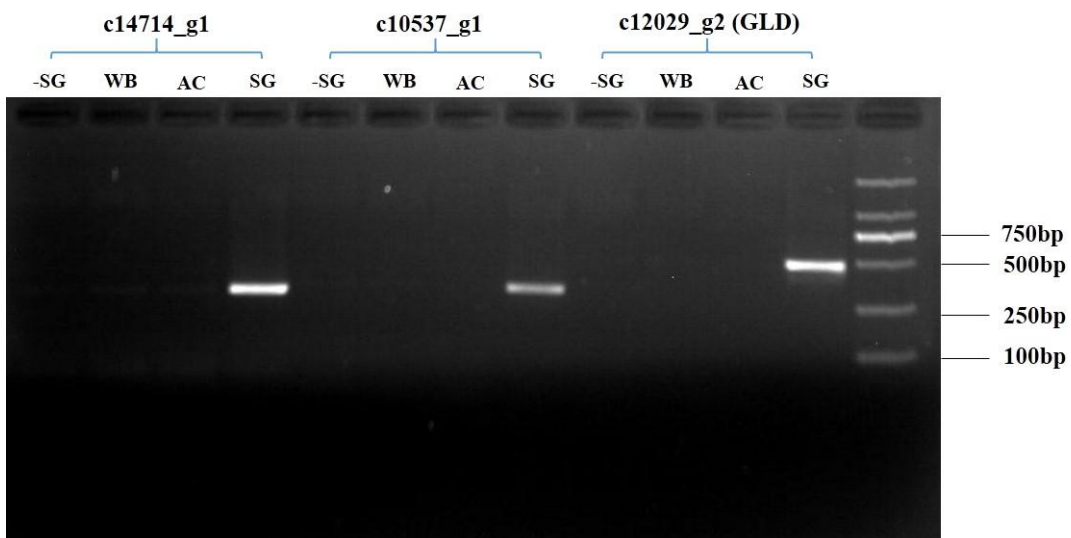

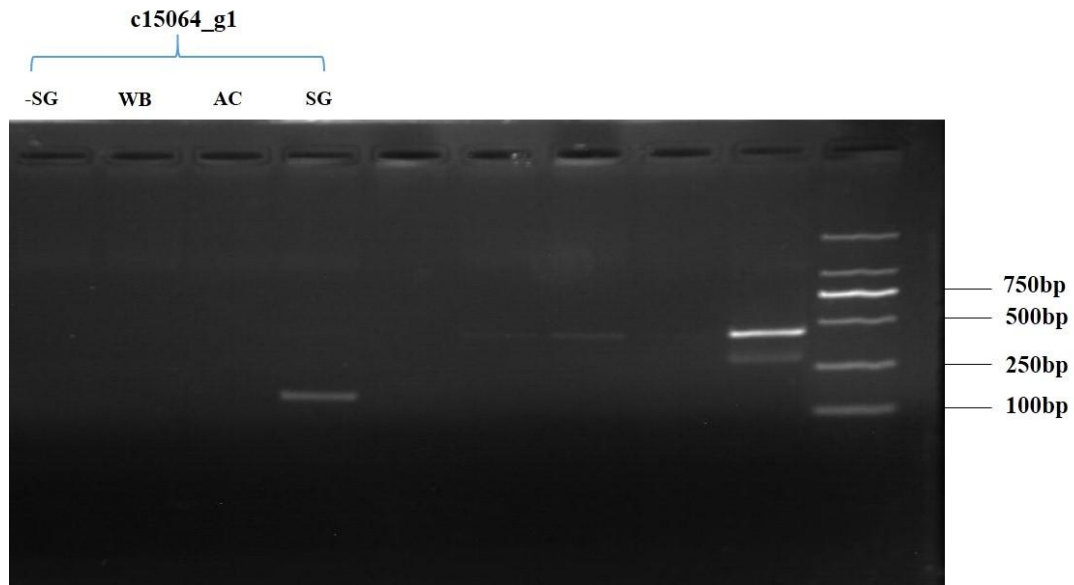

**Supplementary Figure 4. The full-length gels for each unigenes presented in Figure 6a.**

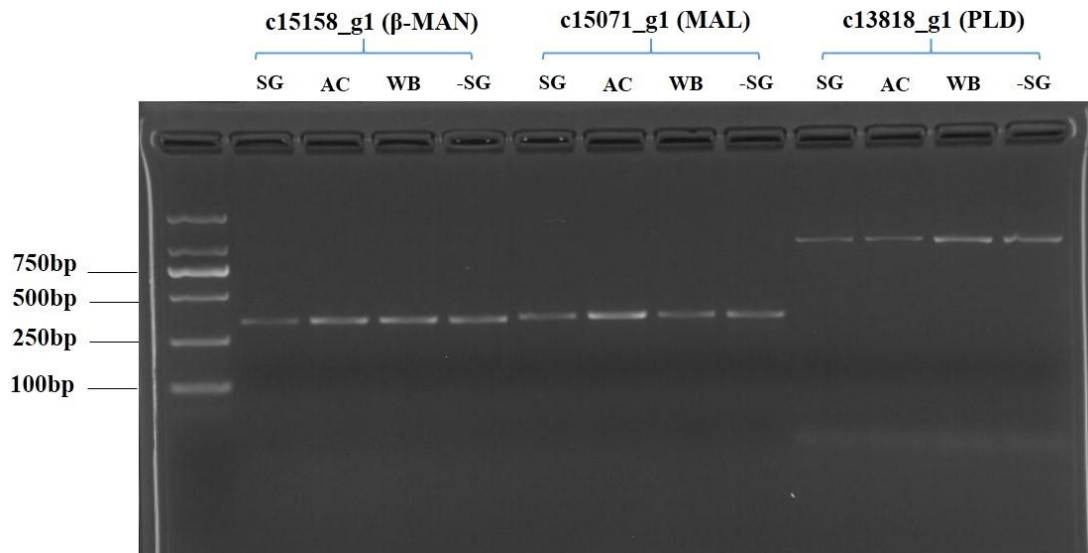

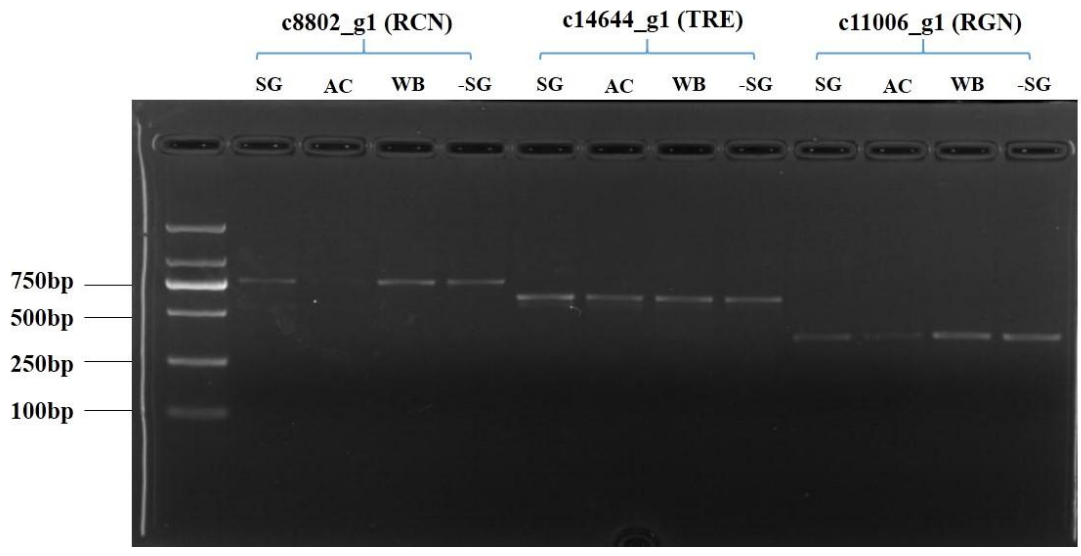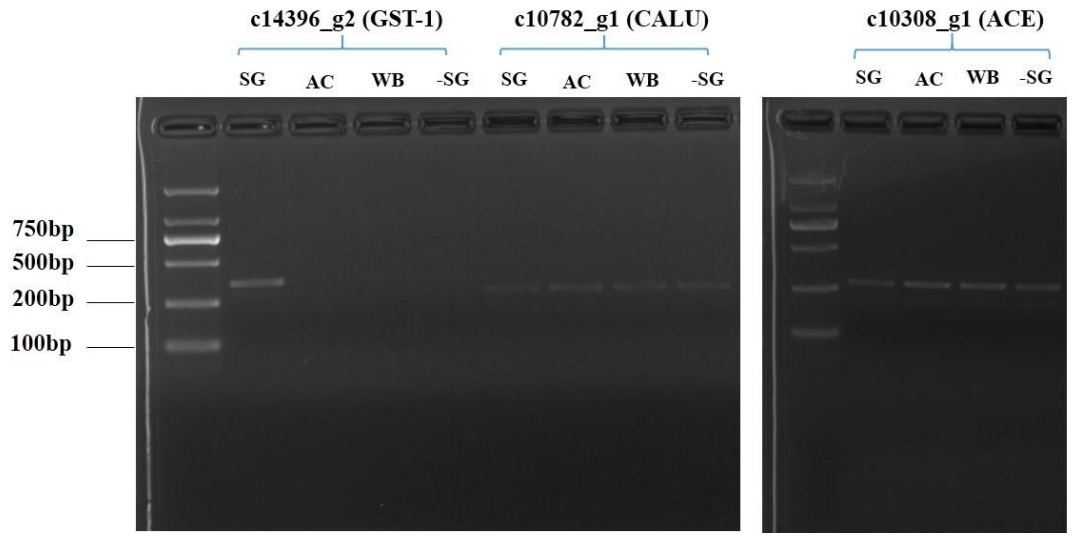

Supplement: 41598_2017_16092_MOESM1_ESM.pdf [file 41598_2017_16092_MOESM1_ESM.pdf]
